# Supplementary material for: Global Methylome Scores Correlate with Histological Subtypes of Colorectal Carcinoma and Show Different Associations with Common Clinical and Molecular Features
Source: MDPI journal article supplement (doi:10.3390/cancers13205165), 2021-10-14
Supplement: s1 [file s1]

# Global Methylome Scores Correlate with Histological Subtypes of Colorectal Carcinoma and Show Different Associations with Common Clinical and Molecular Features

María del Carmen Turpín-Sevilla, Fernando Pérez-Sanz, José García-Solano, Patricia Sebastián-León, Javier Trujillo-Santos, Pablo Carbonell, Eduardo Estrada, Anne Tuomisto, Irene Herruzo, Lochlan J. Fennell, Markus J. Mäkinen, Edith Rodríguez-Braun, Vicki L. J. Whitehall, Ana Conesa and Pablo Conesa-Zamora

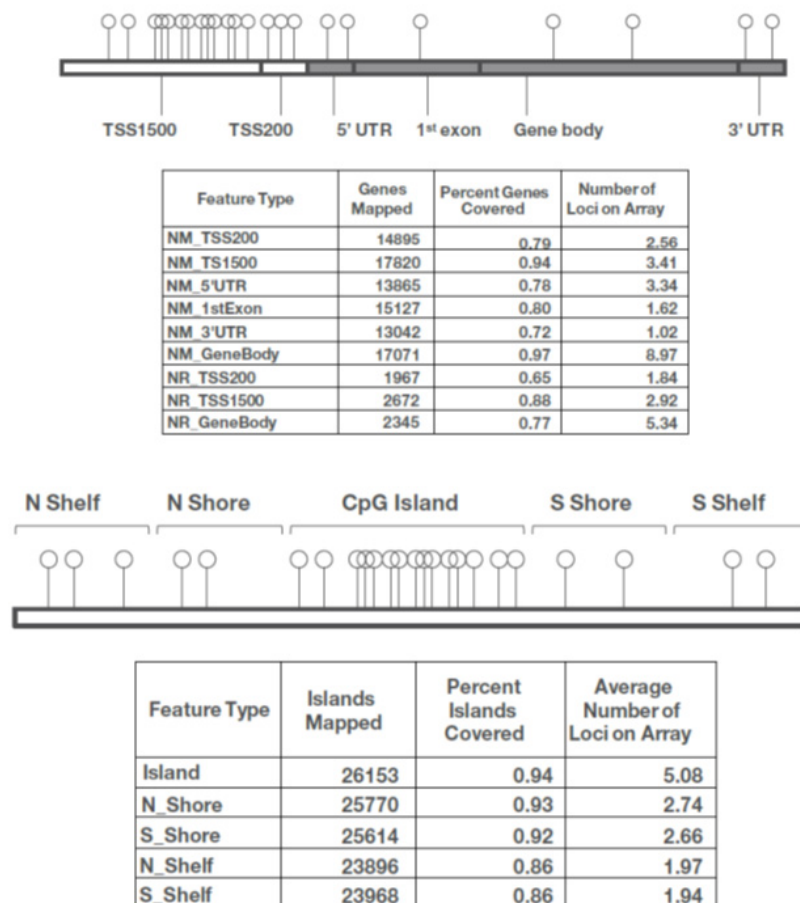

**Figure S1.** These regions were defined based on the manifest and annotation data from the R-packages "IlluminaHumanMethylation450kmanifest" [25] and "IlluminaHumanMethylation450kanno.ilmn12.hg19" [36].

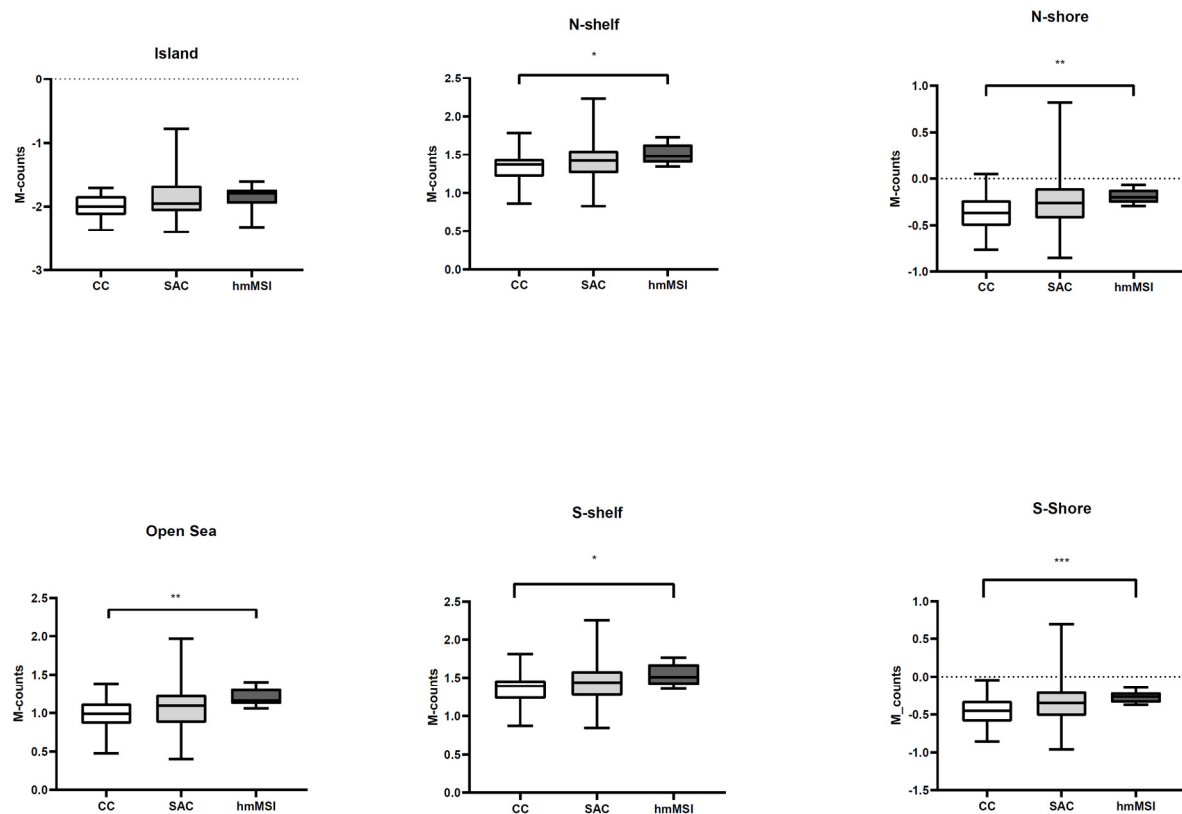

**Figure S2.** Boxplot graphs showing the methylation differences in the regions referred to CpG islands amongst the different histological CRC subtypes. \*  $p < 0.05$ , \*\*  $p < 0.01$ , \*\*\*  $p < 0.001$ .

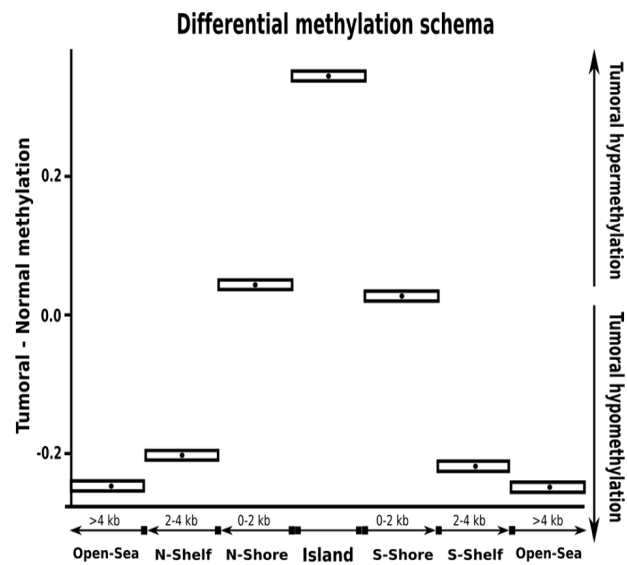

**Figure S3.** Differential methylation schema (tumoral CRC M-value–normal adjacent colorectal mucosa M-value) showing the tumor-associated hyper- and hypomethylation according to the genome locations with respect to the CpG island.

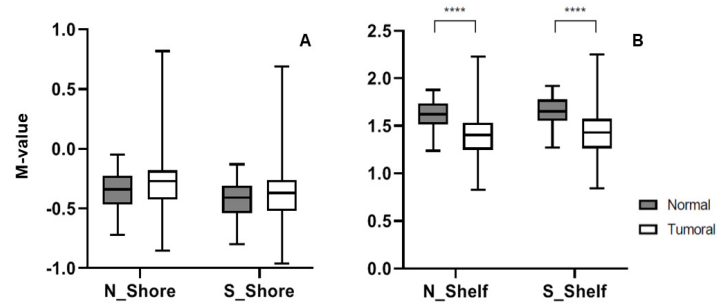

**Figure S4.** Comparison between normal and tumoral methylation in North and South directions of Shores (A) and Shelves (B) areas with respect to CpG island. \*\*\*\*  $p < 0.0001$ .

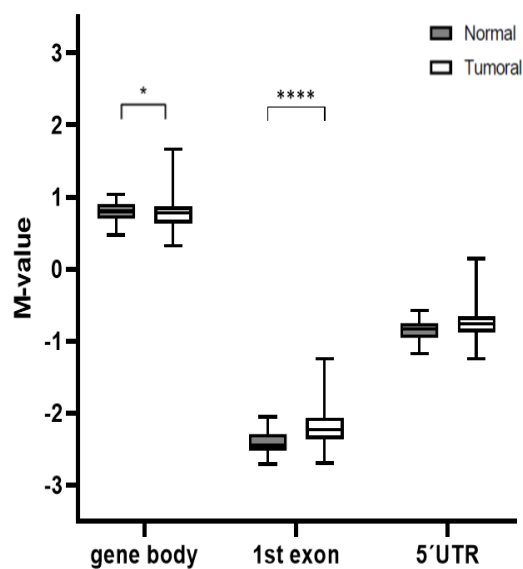

**Figure S5.** Comparison between normal and tumoral methylation in different gene-related locations; i.e. 5'Untranslated Region (5'UTR), First exon and gene body \* $p > 0.05$ , \*\*\*\*  $p < 0.0001$ .

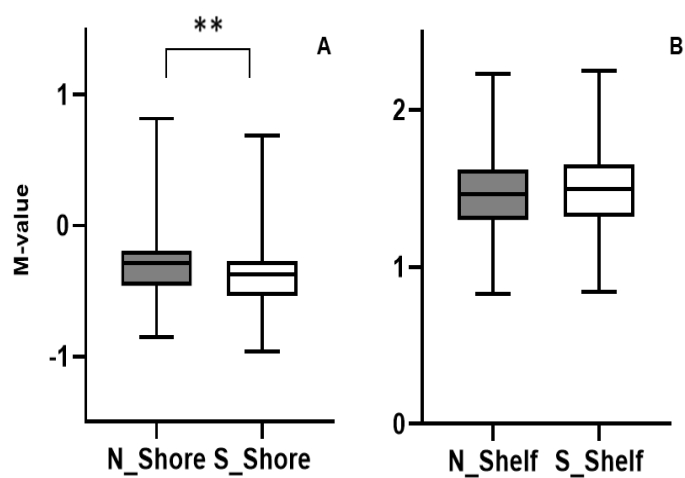

**Figure S6.** Comparison between normal and tumoral methylation in different locations; North and South directions of Shores (A) and Shelves (B) areas with respect to CpG island. \*\*  $p < 0.01$

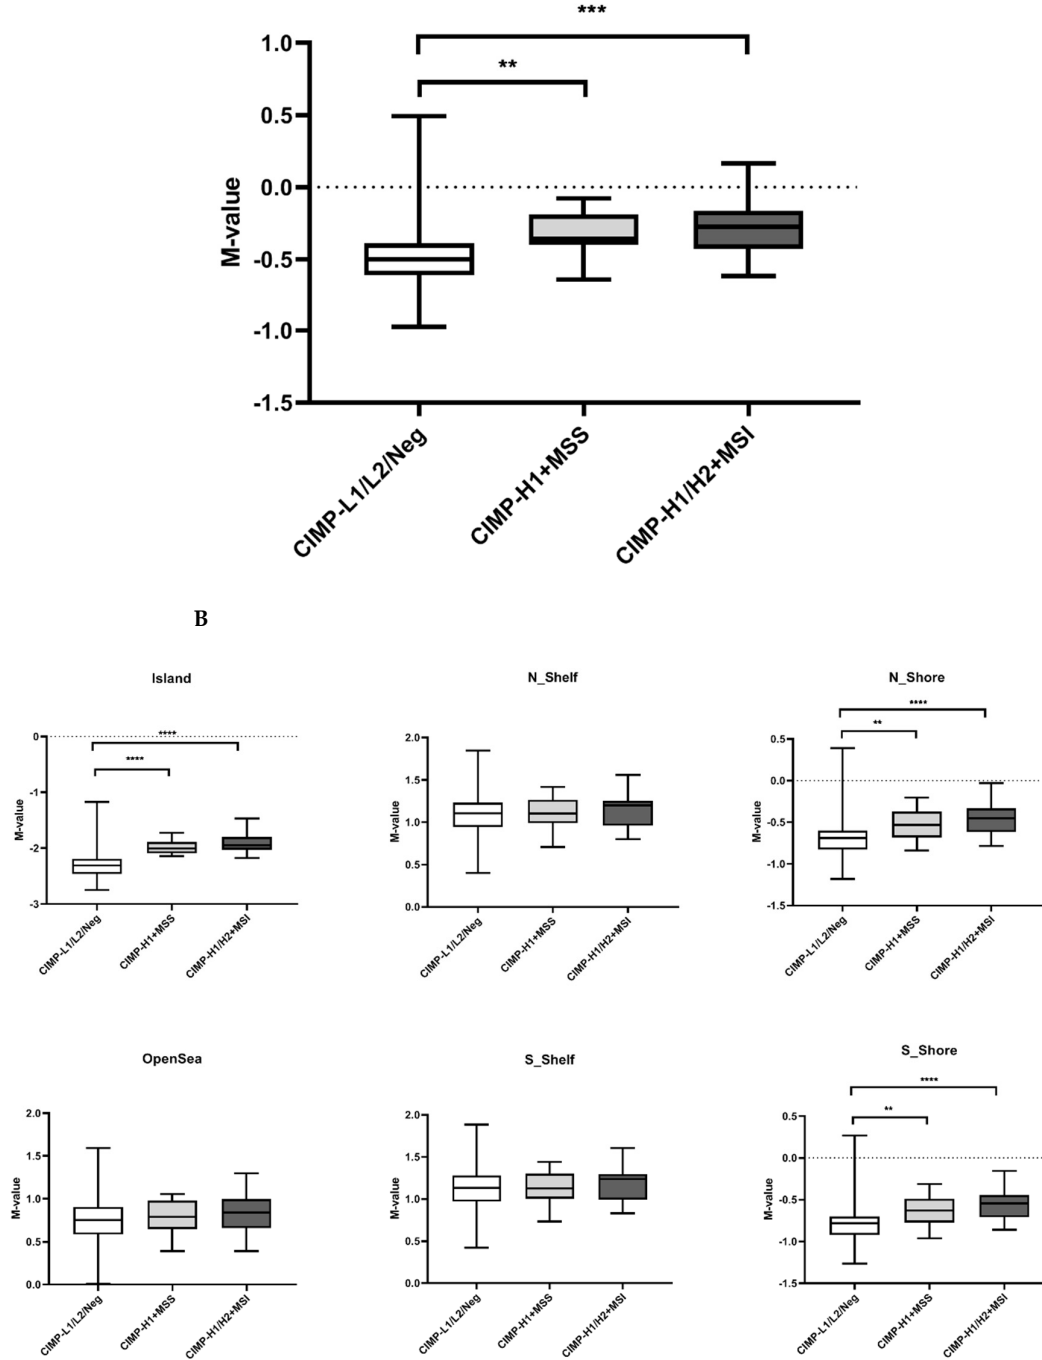

**Figure S7.** Validation of global methylation patterns in an independent series. (A), boxplot graph showing the global methylation level amongst the groups enriched in CC (CIMP-L1-L2-Neg/CIMP-H2/MSS+), SAC (CIMP-H1/MSS+), and hmMSI-H (CIMP-H1-H2/MSI+) histological subtypes. Kruskal Wallis test \*\*\*\* $p < 0.0001$ . Mann Whitney Test (graphs) \*\* $p < 0.01$ , \*\*\* $p < 0.001$  (B), boxplot graphs showing the methylation differences in the regions referred to CpG islands amongst the groups enriched in CC (CIMP-L1-L2-Neg/CIMP-H2/MSS+), SAC (CIMP-H1/MSS+), and hmMSI-H (CIMP-H1-H2/MSI+) histological subtypes \*\* $p < 0.01$ , \*\*\*\* $p < 0.0001$ .

**Table S1.** Association of global methylation scores of adjacent normal mucosa specimens with histopathological features.

|        |         |          | 250 bp |        |          | 1 kb   |        |           | 2 kb   |        |           |
|--------|---------|----------|--------|--------|----------|--------|--------|-----------|--------|--------|-----------|
|        |         | <i>n</i> | Median | IQR    | <i>p</i> | Median | IQR    | <i>p</i>  | Median | IQR    | <i>p</i>  |
| Status | normal  | 35       | 0.2660 | 0.0034 | 0.0100 * | 0.4224 | 0.0083 | <0.0001 * | 0.6345 | 0.0157 | <0.0001 * |
|        | tumoral | 82       | 0.2698 | 0.0106 |          | 0.4106 | 0.0211 |           | 0.5943 | 0.0309 |           |
| Type   | CC      |          |        |        |          |        |        |           |        |        |           |
|        | normal  | 14       | 0.2664 | 0.0033 | 0.8110   | 0.4232 | 0.0054 | <0.0001 * | 0.6358 | 0.0077 | <0.0001 * |
|        | tumoral | 32       | 0.2653 | 0.0092 |          | 0.4051 | 0.0198 |           | 0.5871 | 0.0271 |           |
|        | SAC     |          |        |        |          |        |        |           |        |        |           |
|        | normal  | 15       | 0.2662 | 0.0035 | 0.0160   | 0.4222 | 0.0113 | 0.0010 *  | 0.6360 | 0.0274 | <0.0001 * |
|        | tumoral | 40       | 0.2705 | 0.0104 |          | 0.4121 | 0.0205 |           | 0.5933 | 0.0341 |           |
|        | MSI     |          |        |        |          |        |        |           |        |        |           |
|        | normal  | 6        | 0.2646 | 0.0073 | 0.0050 * | 0.4208 | 0.0102 | 0.5620    | 0.6272 | 0.0222 | 0.0930    |
|        | tumoral | 10       | 0.2764 | 0.0095 |          | 0.4237 | 0.0142 |           | 0.6132 | 0.0347 |           |

Note: *p*-values for Mann-Whitney's *U* test. Chi-squared tests applied for testing the bivariate associations of each variable with type of tumor. The Bonferroni correction for multiple comparisons was applied. Associations with type of tumor are considered significant (marked with \*) if  $p < 0.05/4 = 0.0125$ . CC: Conventional Carcinoma, SAC: Serrated adenocarcinoma, hmMSI-H: Colorectal cancer showing histological and molecular features of high level of microsatellite instability.

**Table S2.** Associations between global methylation scores with the methylation status of the genes included in the CIMP panel.

|         |       |          | 250 bp |        |          | 1 kb   |        |          | 2 kb   |        |          |
|---------|-------|----------|--------|--------|----------|--------|--------|----------|--------|--------|----------|
|         |       | <i>n</i> | Median | IQR    | <i>p</i> | Median | IQR    | <i>p</i> | Median | IQR    | <i>p</i> |
| CAGNA1G | Unmet | 55       | 0.2681 | 0.0105 | 0.0530   | 0.4079 | 0.0210 | 0.2430   | 0.5902 | 0.0316 | 0.3640   |
|         | Met   | 25       | 0.2721 | 0.0115 |          | 0.4152 | 0.0219 |          | 0.5974 | 0.0301 |          |
| CDKN2A  | Unmet | 39       | 0.2665 | 0.0084 | 0.0110   | 0.4066 | 0.0219 | 0.5220   | 0.5900 | 0.0276 | 0.7250   |
|         | Met   | 41       | 0.2721 | 0.0109 |          | 0.4152 | 0.0236 |          | 0.5970 | 0.0334 |          |
| CRABP1  | Unmet | 39       | 0.2676 | 0.0098 | 0.1270   | 0.4095 | 0.0225 | 0.9190   | 0.5939 | 0.0334 | 0.6000   |
|         | Met   | 41       | 0.2709 | 0.0128 |          | 0.4115 | 0.0220 |          | 0.5939 | 0.0301 |          |
| IGF2    | Unmet | 14       | 0.2656 | 0.0089 | 0.1840   | 0.4093 | 0.0245 | 0.9600   | 0.5981 | 0.0408 | 0.5020   |
|         | Met   | 66       | 0.2702 | 0.0115 |          | 0.4114 | 0.0210 |          | 0.5939 | 0.0281 |          |
| MLH1    | Unmet | 59       | 0.2676 | 0.0101 | 0.0260   | 0.4079 | 0.0214 | 0.2110   | 0.5900 | 0.0313 | 0.4600   |
|         | Met   | 21       | 0.2731 | 0.0104 |          | 0.4152 | 0.0197 |          | 0.5974 | 0.0281 |          |
| NEUROG1 | Unmet | 22       | 0.2667 | 0.0096 | 0.1060   | 0.4093 | 0.0238 | 0.8800   | 0.5952 | 0.0327 | 0.6130   |
|         | Met   | 58       | 0.2702 | 0.0114 |          | 0.4122 | 0.0210 |          | 0.5933 | 0.0309 |          |
| RUNX3   | Unmet | 48       | 0.2686 | 0.0100 | 0.1300   | 0.4085 | 0.0222 | 0.8440   | 0.5939 | 0.0319 | 0.6510   |
|         | Met   | 32       | 0.2721 | 0.0143 |          | 0.4135 | 0.0211 |          | 0.5941 | 0.0311 |          |
| SOCS1   | Unmet | 78       | 0.2698 | 0.0106 | 0.4110   | 0.4106 | 0.0215 | 0.7970   | 0.5943 | 0.0309 | 0.2410   |
|         | Met   | 2        | 0.2747 |        |          | 0.4073 |        |          | 0.5747 |        |          |

Note: *p*-values for Mann-Whitney's *U* test. The Bonferroni correction for multiple comparisons was applied for each site; *p* values  $< 0.05/8 = 0.0063$  were considered statistically significant.
